# Supplementary material for: WISDOM Randomized Trial Comparing Risk-Based Versus Annual Breast Cancer Screening: Study Cohort Characteristics and Design
Source: Research Square preprint supplement (doi:10.21203/rs.3.rs-7665355/v1), 2025-10-05
Supplement: Supplementary file 1 [file 32852476441d3ebbf5ae4db7.pdf]

SUPPLEMENTARY INFORMATION

WISDOM Randomized Trial Comparing Risk-Based Versus Annual Breast Cancer Screening:  
Baseline Characteristics and Study Conduct

Fiscalini et al.

Table of Contents

Supplementary Table S1: Minority enrolment in WISDOM..... 2

Supplementary Table S2: List of clinical sites ..... 3

Supplementary Table S3: Factors affecting patient participation choices ..... 4

Supplementary Table S4. Risk assessment and screening recommendations ..... 5

**Supplementary Table S1:** Minority enrolment in WISDOM  
Year-by-year rates of enrolment to WISDOM categorized by self-reported race/ethnicity

|            | White, NH | Black or African American | Native Hawaiian or Other Pac Islander/American Indian or Alaska Native, NH | Asian, NH | Two or More Race, NH | Hispanic or Latino | Unknown/Pref not to answer/other |
|------------|-----------|---------------------------|----------------------------------------------------------------------------|-----------|----------------------|--------------------|----------------------------------|
| Start-2019 | 81.4%     | 1.7%                      | 0.3%                                                                       | 4.5%      | 2.7%                 | 8.1%               | 1.2%                             |
| 2020       | 74.9%     | 4.1%                      | 0.4%                                                                       | 5.9%      | 3.3%                 | 10.4%              | 1.0%                             |
| 2021       | 73.4%     | 8.1%                      | 0.5%                                                                       | 4.0%      | 3.1%                 | 10.2%              | 0.7%                             |
| 2022       | 67.4%     | 11.5%                     | 0.6%                                                                       | 4.4%      | 3.9%                 | 11.4%              | 0.7%                             |
| 2023       | 59.4%     | 17.5%                     | 0.8%                                                                       | 5.8%      | 3.1%                 | 11.8%              | 1.5%                             |
| All Time   | 75.6%     | 5.6%                      | 0.4%                                                                       | 4.6%      | 3.1%                 | 9.6%               | 1.0%                             |

**Supplementary Table S2:** List of clinical sites

List of WISDOM recruitment sites and years of enrolment in WISDOM 1.0

| Site                                   | Year<br>Site Opened |
|----------------------------------------|---------------------|
| Initial sites                          |                     |
| University of California San Francisco | 2016                |
| University of California San Diego     | 2016                |
| University of California Los Angeles   | 2017                |
| University of California Davis         | 2017                |
| University of California Irvine        | 2017                |
| Sanford Health                         | 2017                |
| Expansion sites                        |                     |
| University of Chicago                  | 2019                |
| University of Alabama at Birmingham    | 2020                |
| Diagnostic Center of Miami             | 2020                |
| Louisiana State University             | 2020                |
| Veterans Affairs*                      | 2021                |

\*Recruitment only through select VA centers

**Supplementary Table S3:** Factors affecting patient participation choices

Multivariate Analysis Comparing Participant Choice of Randomized versus Self-Selection into Annual or Personalized. NH = Non-hispanic

|                                                                     | Self-Select Risk-based vs Randomized |                |                 |         | Self-Select Annual vs Randomized |                |                 |         |
|---------------------------------------------------------------------|--------------------------------------|----------------|-----------------|---------|----------------------------------|----------------|-----------------|---------|
|                                                                     | RR                                   | Lower CI: 2.5% | Upper CI: 97.5% | p-value | RR                               | Lower CI: 2.5% | Upper CI: 97.5% | p-value |
| <b>Age (years) at Group Selected Date</b>                           |                                      |                |                 |         |                                  |                |                 |         |
| 40-49                                                               | ref                                  | ref            | ref             | ref     | ref                              | ref            | ref             | ref     |
| 50-59                                                               | 0.93                                 | 0.89           | 0.97            | 0.0002  | 1.27                             | 1.09           | 1.48            | 0.0018  |
| 60-69                                                               | 0.88                                 | 0.84           | 0.92            | <0.0001 | 1.54                             | 1.29           | 1.84            | <0.0001 |
| 70-74                                                               | 0.79                                 | 0.73           | 0.84            | <0.0001 | 2.01                             | 1.64           | 2.47            | <0.0001 |
| <b>Race, Ethnicity</b>                                              |                                      |                |                 |         |                                  |                |                 |         |
| NH White                                                            | ref                                  | ref            | ref             | ref     | ref                              | ref            | ref             | ref     |
| Hispanic                                                            | 1.15                                 | 1.11           | 1.20            | <0.0001 | 1.22                             | 1.04           | 1.41            | 0.0118  |
| NH Asian                                                            | 1.20                                 | 1.14           | 1.27            | <0.0001 | 1.41                             | 1.17           | 1.71            | 0.0004  |
| NH Black or African American                                        | 1.03                                 | 0.97           | 1.09            | 0.3825  | 1.58                             | 1.33           | 1.88            | <0.0001 |
| NH More than one race                                               | 1.14                                 | 1.07           | 1.21            | <0.0001 | 0.75                             | 0.55           | 1.04            | 0.0886  |
| NH Native Hawaiian or Other Pac Islander/Am Indian or Alaska Native | 0.87                                 | 0.71           | 1.08            | 0.2124  | 0.89                             | 0.41           | 1.93            | 0.7654  |
| Other/Unknown                                                       | 1.34                                 | 1.22           | 1.48            | <0.0001 | 1.46                             | 1.00           | 2.13            | 0.0521  |
| <b>Family History at Baseline</b>                                   |                                      |                |                 |         |                                  |                |                 |         |
| No First or Second Degree Relative                                  | ref                                  | ref            | ref             | ref     | ref                              | ref            | ref             | ref     |
| First Degree Relative                                               | 1.48                                 | 1.42           | 1.53            | <0.0001 | 0.98                             | 0.86           | 1.11            | 0.7066  |
| Second Degree Relative                                              | 1.23                                 | 1.19           | 1.28            | <0.0001 | 0.93                             | 0.84           | 1.04            | 0.2168  |
| First and Second Degree Relative                                    | 1.60                                 | 1.54           | 1.66            | <0.0001 | 0.96                             | 0.82           | 1.12            | 0.5673  |
| Don't Know                                                          | 1.21                                 | 1.15           | 1.26            | <0.0001 | 0.79                             | 0.67           | 0.94            | 0.0077  |
| No Response/Missing                                                 | 1.27                                 | 1.15           | 1.40            | <0.0001 | 0.97                             | 0.67           | 1.40            | 0.8705  |
| <b>Any Atypia Biopsies<sup>†</sup></b>                              |                                      |                |                 |         |                                  |                |                 |         |
| Not Biopsied                                                        | ref                                  | ref            | ref             | ref     | ref                              | ref            | ref             | ref     |
| Biopsied - No ADH                                                   | 1.09                                 | 1.06           | 1.12            | <0.0001 | 1.11                             | 1.01           | 1.23            | 0.0336  |
| Biopsied - Yes ADH                                                  | 1.45                                 | 1.35           | 1.56            | <0.0001 | 1.27                             | 0.87           | 1.86            | 0.2069  |
| <b>Hormone Replacement Therapy Use Ever<sup>†</sup></b>             |                                      |                |                 |         |                                  |                |                 |         |
| None                                                                | ref                                  | ref            | ref             | ref     | ref                              | ref            | ref             | ref     |
| One or More                                                         | 1.11                                 | 1.07           | 1.14            | <0.0001 | 1.16                             | 1.05           | 1.29            | 0.0043  |
| <b>Age (years) at Menarche<sup>†</sup></b>                          |                                      |                |                 |         |                                  |                |                 |         |
| 12 to 13                                                            | ref                                  | ref            | ref             | ref     | ref                              | ref            | ref             | ref     |
| Under age 12                                                        | 0.97                                 | 0.94           | 1.00            | 0.0769  | 0.93                             | 0.82           | 1.06            | 0.2940  |
| 14 or above                                                         | 1.00                                 | 0.97           | 1.03            | 0.9317  | 0.99                             | 0.89           | 1.10            | 0.8273  |
| <b>Age (years) at first live birth<sup>†</sup></b>                  |                                      |                |                 |         |                                  |                |                 |         |
| Nulliparous                                                         | ref                                  | ref            | ref             | ref     | ref                              | ref            | ref             | ref     |
| <20 years                                                           | 0.95                                 | 0.90           | 1.00            | 0.0637  | 0.92                             | 0.75           | 1.12            | 0.3950  |
| 20-24 years                                                         | 0.94                                 | 0.90           | 0.98            | 0.0085  | 0.94                             | 0.82           | 1.09            | 0.4467  |
| 25-29 years                                                         | 0.96                                 | 0.92           | 1.00            | 0.0391  | 1.03                             | 0.90           | 1.18            | 0.6621  |
| 30-34 years                                                         | 1.02                                 | 0.99           | 1.07            | 0.2246  | 0.94                             | 0.80           | 1.09            | 0.3860  |
| >34 years                                                           | 1.05                                 | 1.00           | 1.10            | 0.0412  | 0.96                             | 0.81           | 1.14            | 0.6679  |
| <b>Baseline Area Deprivation Index<sup>†</sup> (ADI)</b>            |                                      |                |                 |         |                                  |                |                 |         |
| Least Disadvantaged (1 to 3)                                        | ref                                  | ref            | ref             | ref     | ref                              | ref            | ref             | ref     |
| Middle Disadvantaged (4 to 6)                                       | 1.00                                 | 0.97           | 1.03            | 0.8976  | 0.96                             | 0.87           | 1.07            | 0.4578  |
| Most Disadvantaged (7 to 10)                                        | 0.94                                 | 0.91           | 0.98            | 0.0018  | 0.94                             | 0.83           | 1.06            | 0.3016  |
| Data suppressed/Not geocoded                                        | 1.08                                 | 1.02           | 1.15            | 0.0131  | 1.18                             | 0.96           | 1.46            | 0.1236  |

<sup>†</sup> denotes imputed variable

<sup>†</sup> Kind & Buckingham, N. Engl. J. Med. 378, 2456–2458 (2018).

Deleted: ¶

**Supplementary Table S4.** Risk assessment and screening recommendations

| Risk:                  | Highest Risk                                                                                                                                                                                                                                                                                            | Elevated Risk                                                                                                                                                                                                                                                                                                                                         | Average Risk                                                                                                      | Lowest Risk                                                               |
|------------------------|---------------------------------------------------------------------------------------------------------------------------------------------------------------------------------------------------------------------------------------------------------------------------------------------------------|-------------------------------------------------------------------------------------------------------------------------------------------------------------------------------------------------------------------------------------------------------------------------------------------------------------------------------------------------------|-------------------------------------------------------------------------------------------------------------------|---------------------------------------------------------------------------|
| Criteria/<br>Threshold | BRCA1/2, TP53, PTEN, STK11, CDH1 mutation carrier<br>OR<br>ATM, PALB2 or CHEK2 mutation carrier with positive family history of breast cancer<br>OR<br>Women with a $\geq 6\%$ 5-year risk (risk of an average BRCA carrier)<br>OR<br>Women with a history of mantle radiation between ages 10-30 years | Women aged 40-49 with extremely dense breasts<br>OR<br>Women at a $\geq 1\%$ 5-year risk of developing ER-breast cancer based on susceptibility SNPs<br>OR<br>Women in top 2.5 <sup>th</sup> percentile of risk by 1-year age category<br>OR<br>ATM, PALB2 or CHEK2 mutation carrier without a positive family history <sup>**</sup> of breast cancer | Women aged 50-74<br>OR<br>Women aged 40-49 with a $\geq 1.3\%$ 5-year risk (risk of an average 50 year-old woman) | Women aged 40-49 with a $< 1.3\%$ 5-year risk of developing breast cancer |
| Screening Rec:         | Annual mammogram<br>Adjunct MRI<br>BHS active outreach<br>Risk reduction consultation                                                                                                                                                                                                                   | Annual mammogram*<br>BHS active outreach<br>Risk reduction consultation                                                                                                                                                                                                                                                                               | Biennial mammogram <sup>†</sup>                                                                                   | No screening until age 50                                                 |

\* If individual does not meet criteria for annual mammogram + MRI

<sup>†</sup> If individual does not meet criteria for annual mammogram or annual mammogram + MRI

<sup>\*\*</sup> Family history is defined as a first degree relative with breast cancer, two second-degree relatives with breast cancer, or one second-degree relative diagnosed prior to age 45.

(previously published in Esserman et al. *NPJ Breast Cancer*. 2017;3(1):34. doi:10.1038/s41523-017-0035-5)
